# Supplementary material for: High U(vi) adsorption capacity by mesoporous Mg(OH)2 deriving from MgO hydrolysis
Source: Royal Society of Chemistry journal article supplement (doi:10.1039/c3ra41051j), 2013-01-01
Supplement: c3ra41051j.pdf [file c3ra41051j.pdf]

## Supplementary Material

### High U(VI) adsorption capacity by mesoporous Mg(OH)<sub>2</sub> deriving from MgO hydrolysis

Huijun Yan<sup>a,b</sup>, Jianwei Bai<sup>c</sup>, Xi Chen<sup>a</sup>, Jun Wang<sup>a,d,\*</sup>, Hongsen Zhang<sup>a</sup>, Qi Liu<sup>a</sup>, Milin Zhang<sup>a</sup>,  
and Lianhe Liu<sup>d</sup>

<sup>a</sup> Key Laboratory of Superlight Material and Surface Technology, Ministry of Education, Harbin Engineering University, 150001, PR China.

<sup>b</sup> Department of Chemistry, Harbin University, 150086, PR China.

<sup>c</sup> Polymer Materials Research Center, Harbin Engineering University, 150001, PR China.

<sup>d</sup> Institute of Advanced Marine Materials, Harbin Engineering University, 150001, PR China.

\* Corresponding author: Tel.: +86 451 8253 3026; fax: +86 451 8253 3026. E-mail address: junwang@hrbeu.edu.cn

Table S1. Comparison of U(VI) sorption performance of different equilibrium concentration of uranium, pH = 6, t = 4 h, T = 298 K, V = 50 mL, HMMM dose = 0.138 mmol.

| Initial U(VI)<br>concentration<br>(C <sub>0</sub> /mg L <sup>-1</sup> ) | Equilibrium U(VI)<br>concentration<br>(C <sub>e</sub> /mg L <sup>-1</sup> ) | Adsorption<br>capacity<br>(Q <sub>e</sub> /mg g <sup>-1</sup> ) |
|-------------------------------------------------------------------------|-----------------------------------------------------------------------------|-----------------------------------------------------------------|
| 10                                                                      | 0.72                                                                        | 58                                                              |
| 20                                                                      | 0.87                                                                        | 119                                                             |
| 30                                                                      | 0.96                                                                        | 181                                                             |
| 50                                                                      | 1.13                                                                        | 305                                                             |
| 100                                                                     | 1.35                                                                        | 616                                                             |
| 200                                                                     | 1.64                                                                        | 1239                                                            |
| 300                                                                     | 1.83                                                                        | 1863                                                            |
| 400                                                                     | 1.96                                                                        | 2487                                                            |
| 500                                                                     | 2.17                                                                        | 3111                                                            |
